# Supplementary material for: The application of a biostimulant based on tannins affects root architecture and improves tolerance to salinity in tomato plants
Source: PubMed Central journal article supplement (PMC7801735; doi:10.1038/s41598-020-79770-5), 2021-01-11
Supplement: 41598_2020_79770_MOESM1_ESM.pdf [file 41598_2020_79770_MOESM1_ESM.pdf]

# The application of a biostimulant based on tannins affects root architecture and improves tolerance to salinity in tomato plants

Cristina Campobenedetto<sup>1,2,3b</sup>, Giuseppe Mannino<sup>1</sup>, Jules Beekwilder<sup>3a</sup>, Valeria Contartese<sup>2</sup>, Romyana Karlova<sup>3b\*</sup>, Cinzia M. Berteà<sup>1\*</sup>

<sup>1</sup> Plant Physiology Unit, Department of Life Sciences and Systems Biology, University of Torino, Turin, Italy; [cristina.campobenedetto@unito.it](mailto:cristina.campobenedetto@unito.it) (CC); [giuseppe.mannino@unito.it](mailto:giuseppe.mannino@unito.it) (GM); [cinzia.bertea@unito.it](mailto:cinzia.bertea@unito.it) (CMB)

<sup>2</sup> Green Has Italia S.p.A, Canale (CN), Italy; [c.campobenedetto@greenhasitalia.it](mailto:c.campobenedetto@greenhasitalia.it) (CC); [v.contartese@greenhasitalia.it](mailto:v.contartese@greenhasitalia.it) (VC)

<sup>3a</sup> Wageningen University and Research Centre, Bioscience, Wageningen, The Netherlands; [jules.beekwilder@wur.nl](mailto:jules.beekwilder@wur.nl) (JB)

<sup>3b</sup> Laboratory of Plant Physiology, Plant Sciences Group, Wageningen University and Research, 6708PB, 9 Wageningen, The Netherlands; [romyana.karlova@wur.nl](mailto:romyana.karlova@wur.nl) (R.K.)

\* Correspondence: [romyana.karlova@wur.nl](mailto:romyana.karlova@wur.nl) and [cinzia.bertea@unito.it](mailto:cinzia.bertea@unito.it); Tel.: +39-011-670-6361

## Supplementary Files

**Supplementary Table 1:** qPCR conditions used for the amplification of both target and reference genes.

| Phase                | Time   | Temperature |       |
|----------------------|--------|-------------|-------|
| Initial denaturation | 10 min | 95°C        |       |
| Denaturation         | 15 sec | 95°C        | ← 45X |
| Annealing            | 20 sec | 57°C        |       |
| Extension            | 30 sec | 72°C        |       |
|                      | 60 sec | 95°C        |       |
| Melting curve        | 30 sec | 55°C        |       |
|                      | 30 sec | 95°C        |       |

22 **Supplementary Table 2:** Nucleotide primer sequences of reference and target genes used for the qPCR analysis.

23

| Accession Number | ID (SolGenomics) | Genes                                                 |                 | Nucleotide Sequences                                                |
|------------------|------------------|-------------------------------------------------------|-----------------|---------------------------------------------------------------------|
| XM_004252513.4   | Solyc12g056750   | <i>WRKY transcription factor 61</i>                   | <i>WRKYTF61</i> | <b>F</b> AGTGTTCAATTCGAGGATGCA<br><b>R</b> AGCTTTCATGATTGTGTTTGCCT  |
| XM_015217355.1   | Solyc04g082550   | <i>Trehalose 6-phosphate phosphatase</i>              | <i>T6PP</i>     | <b>F</b> TGGAACAAAGGTCATGCATTGG<br><b>R</b> TGGTGTCTTTTGGAGCAGCA    |
| XM_006358777.2   | Solyc05g024410   | <i>Na<sup>+</sup>/H<sup>+</sup> exchanger 8</i>       | <i>NHE8</i>     | <b>F</b> TGATTTGCAAGGATGTGCTCC<br><b>R</b> CTAGCGGCTTTCCCAATCGA     |
| AK329746.1       | Solyc10g084910   | <i>C<sub>2</sub>H<sub>2</sub> zinc finger protein</i> | <i>C2H2ZnFP</i> | <b>F</b> TTAGAAAACAAGGGCATGGAGC<br><b>R</b> GAAGTTCAAATCGTGGATCTGTG |
| XM_015210287.2   | Solyc02g081340   | <i>Glutathione S-transferase</i>                      | <i>GSF</i>      | <b>F</b> AAGCCACCTCCCTAGCCTTA<br><b>R</b> TGGGCCGGGTAACATCTCTA      |
| XM_004251487.4   | Solyc12g006050   | <i>Major facilitator superfamily protein</i>          | <i>MFSP</i>     | <b>F</b> AACAAACGAAGGGAAAACGCG<br><b>R</b> TCGAGTTGTCCAACGTAGGC     |
| XM_015223407.2   | Solyc06g084330   | <i>Early-responsive to dehydration stress</i>         | <i>ERD</i>      | <b>F</b> TGAGCACCAAAGAGGCTTCC<br><b>R</b> ACTGTATCCTTCACCACCGC      |
| XM_015233991.2   | Solyc10g009580   | <i>Glycosyltransferase</i>                            | <i>GST</i>      | <b>F</b> ATGTGTCGGTTGGTGGATTT<br><b>R</b> GTCTGCAAAGAGAGGCCAAG      |
| XM_015228135.2   | Solyc08g005610   | <i>Xyloglucan endotransglucosylase-hydrolase 5</i>    | <i>XETGH</i>    | <b>F</b> TCCCCGGTACACTCTTCAAC<br><b>R</b> ATGAATGACCCGAGCAAATC      |
| XM_004235321.4   | Solyc03g098010   | <i>Phosphate starvation inducible gene</i>            | <i>TPSII</i>    | <b>F</b> GATCATTGCCTTGAGCACAT<br><b>R</b> TTCAACCCTTTCACGTCTCC      |

24

25

26 **Supplementary Figure 1:** Root length (A), root fresh weight (B) and NDVI (C) of plants  
 27 treated with 1 mL L<sup>-1</sup> VIVEMA TWIN, 75 μM Gallic Acid, or water. Roots were collected 2  
 28 weeks after the treatment, whereas NDVI index was measured before plant collection. The  
 29 biometric parameters were evaluated on both unstressed and 100 mM NaCl stressed plants.  
 30 Bars represent the means ± SD of twenty biological replicates. Among the same series,  
 31 statistical differences are indicated by different letters (ANOVA, Tukey-Kramer's post-hoc  
 32 test,  $p \leq 0.05$ ).

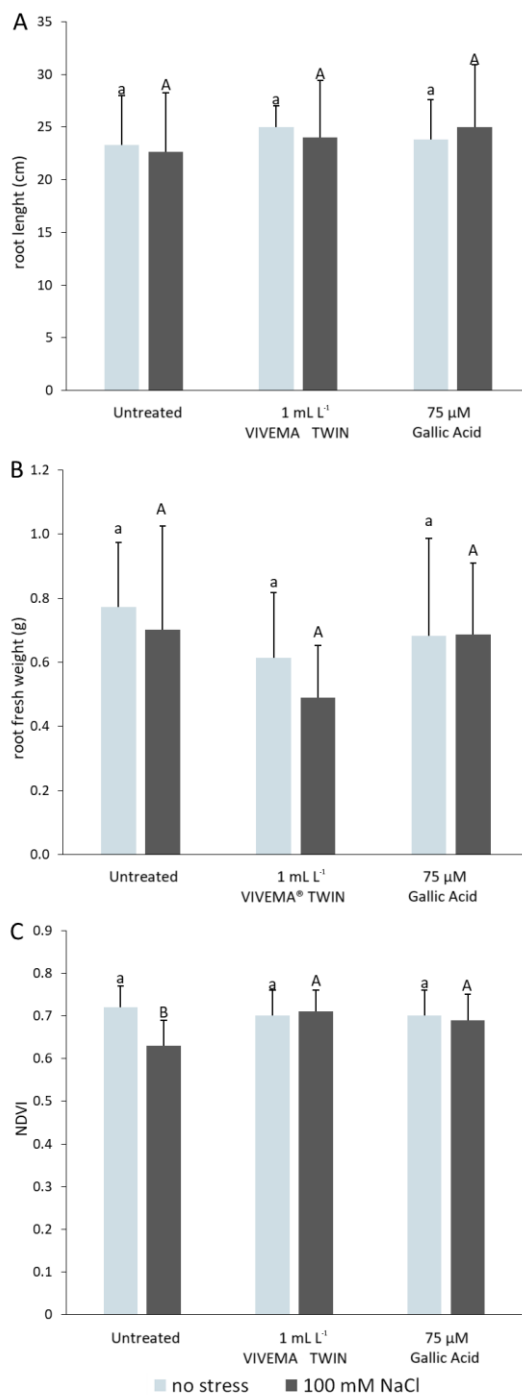

34 **Supplementary Figure 2:** Gene Ontology (GO) enrichment bar charts of differentially expressed genes (DEGs) of tomato plants that were treated  
 35 with 1 mL L<sup>-1</sup> VIVEMA TWIN and 100 mM salt stress or only with 100 mM salt stress (control). Panel A shows the top 30 upregulated enriched GO  
 36 terms, meanwhile Panel B the top 30 downregulated GO terms. In both panels, the colors represent different GO types, and in particular those involved  
 37 in biological process (green color) or in cellular component and molecular function (orange color).  
 38

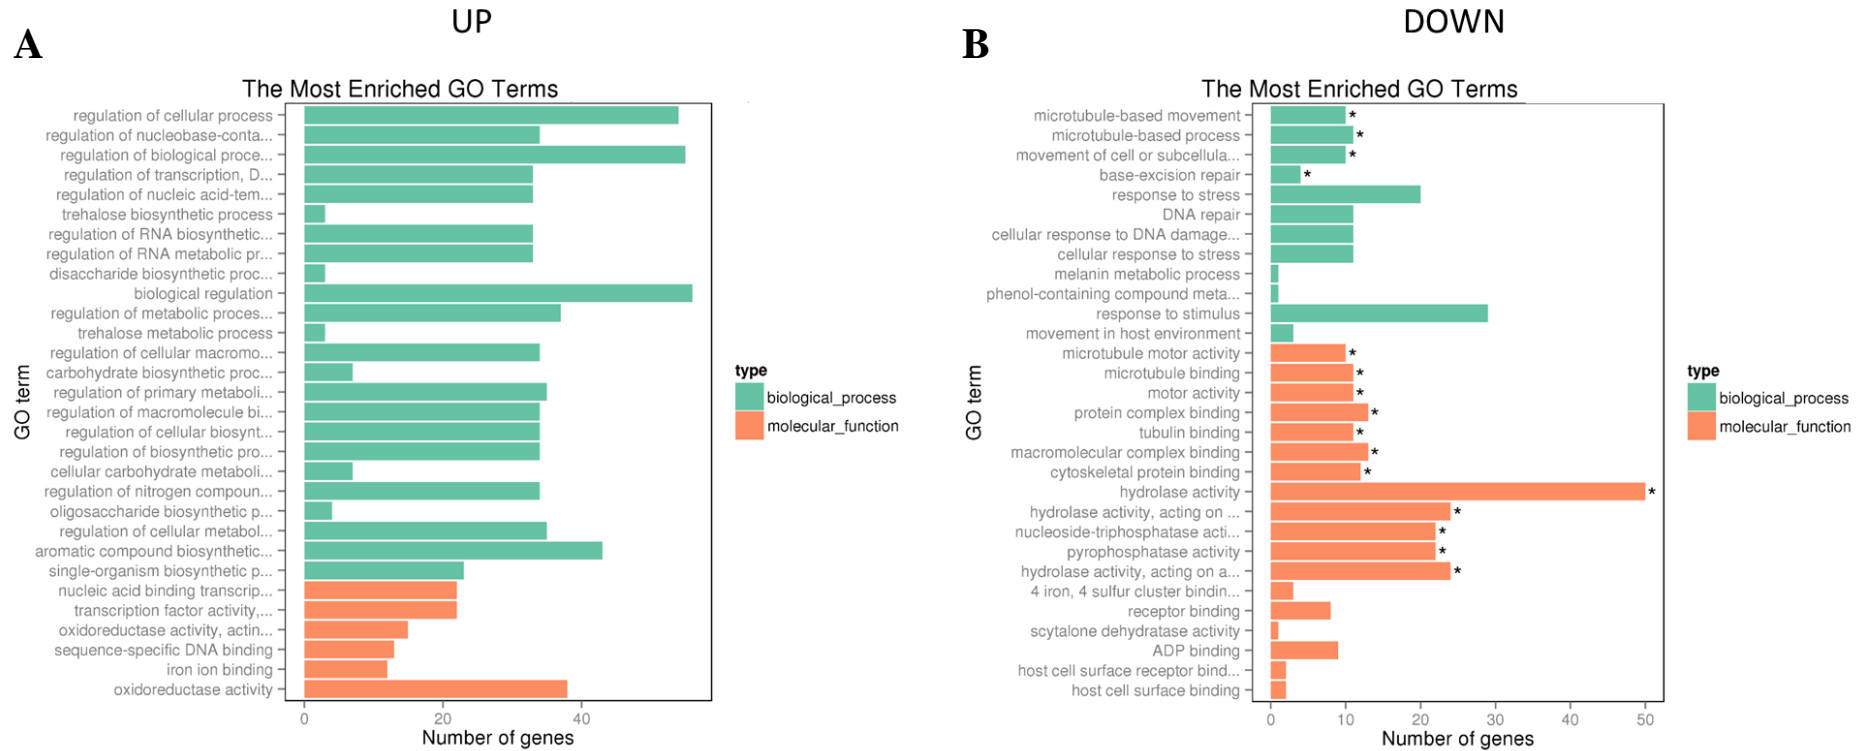

39  
 40

41 **Supplementary Figure 3:** Kyoto Encyclopedia of Genes and Genomes (KEGG) enrichment scatter plots of plants treated with 100 mM NaCl stress  
 42 and 1 mL L<sup>-1</sup> VIVEMA TWIN or only with salt stress (control). Panel A displays the 20 most significant enriched pathways for upregulated genes,  
 43 meanwhile Panel B the most significant 20 enriched pathways for downregulated genes. The differentially expressed genes were grouped into gene  
 44 pathways using the pathway enrichment analysis with the KEGG database and KOBAS software. In both panels, X-axis represents the name of the  
 45 pathway and the Y-axis represents the Rich Factor. The size stands for the number of difference genes and the colour stands for different Q-values.  
 46 The size of the circle is proportional to the number of enriched genes.  
 47

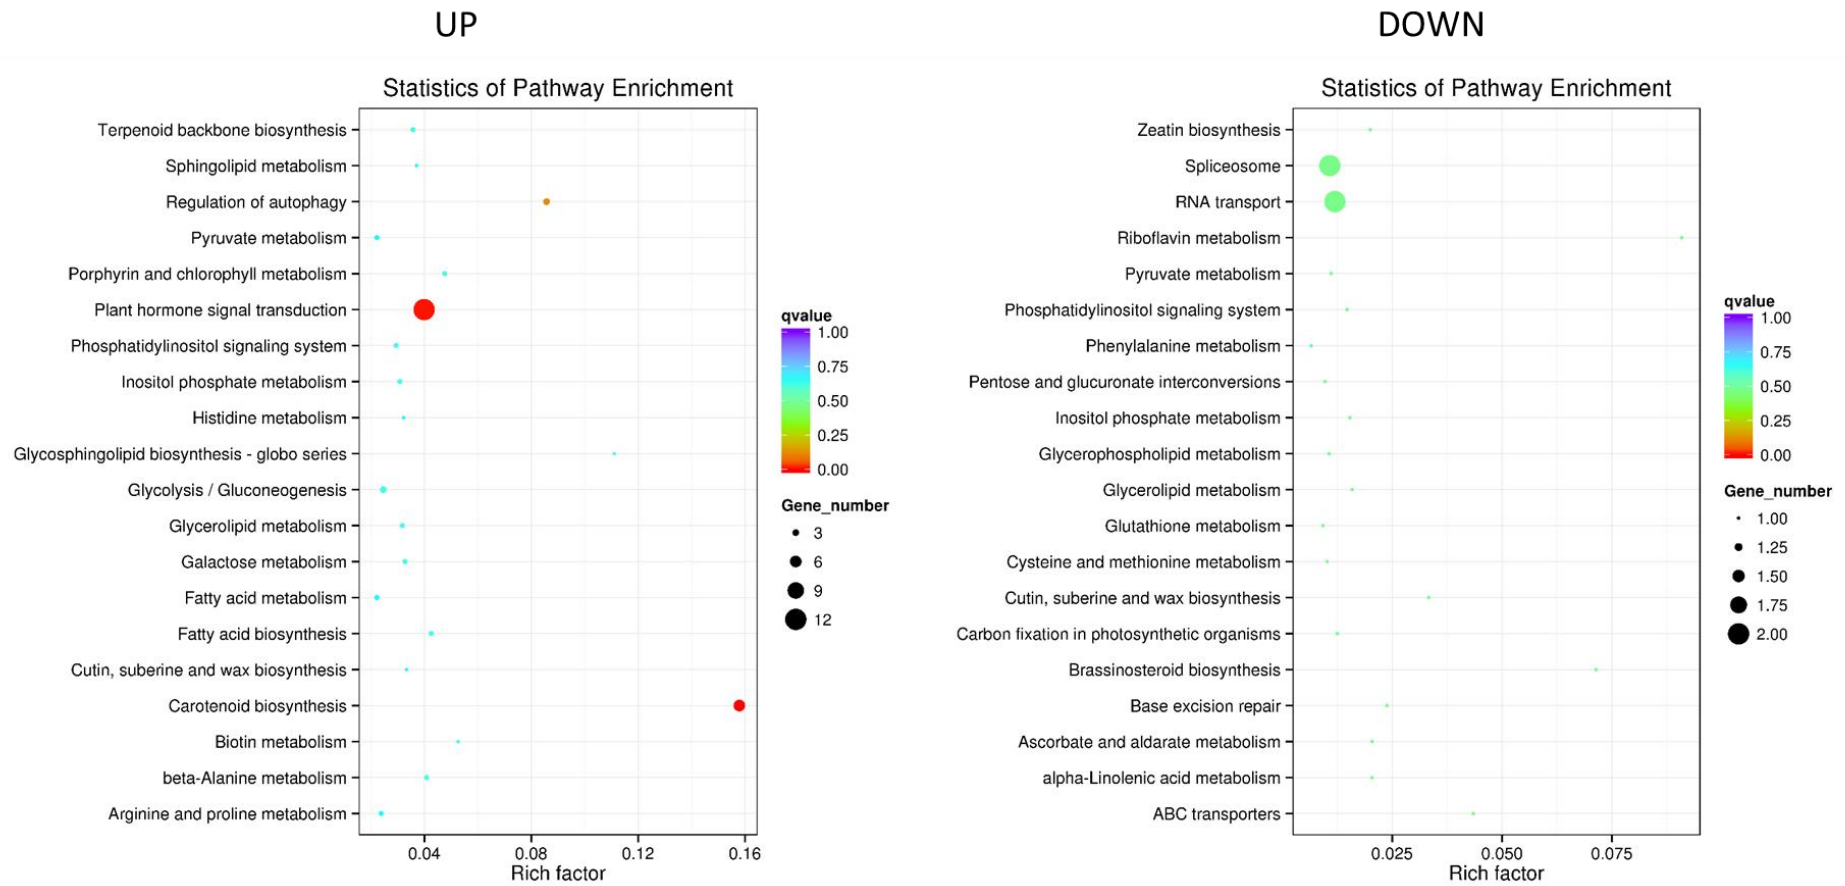

49 **Supplementary Table 3:** List of all Differentially Expressed Genes (DEGs) found in plant  
 50 roots treated with 100 mM NaCl and 1 mL L<sup>-1</sup> VIVEMA TWIN versus roots treated with 100  
 51 mM NaCl only. For each Gene, the ID (gene identification code), FC (fold change), log<sub>2</sub>FC  
 52 (log<sub>2</sub> fold change), pval (*p* value), padj (*p* value adjusted) are reported.  
 53

| Gene_id          | log <sub>2</sub> FC | FC   | pval | padj |
|------------------|---------------------|------|------|------|
| Solyc05g015890.3 | 2.86                | 7.24 | 0.00 | 0.03 |
| Solyc10g076670.2 | 1.70                | 3.26 | 0.00 | 0.04 |
| Solyc12g096930.2 | 1.65                | 3.13 | 0.00 | 0.00 |
| Solyc06g051560.3 | 1.57                | 2.97 | 0.00 | 0.00 |
| Solyc12g056750.2 | 1.56                | 2.95 | 0.00 | 0.00 |
| Solyc11g011340.2 | 1.52                | 2.86 | 0.00 | 0.01 |
| Solyc04g082550.2 | 1.46                | 2.76 | 0.00 | 0.00 |
| Solyc02g077980.2 | 1.32                | 2.50 | 0.00 | 0.00 |
| Solyc03g007340.3 | 1.32                | 2.50 | 0.00 | 0.02 |
| Solyc05g016710.2 | 1.32                | 2.49 | 0.00 | 0.05 |
| Solyc10g009580.3 | 1.31                | 2.48 | 0.00 | 0.00 |
| Solyc01g057170.3 | 1.30                | 2.47 | 0.00 | 0.00 |
| Solyc06g050800.3 | 1.30                | 2.46 | 0.00 | 0.02 |
| Novel00272       | 1.25                | 2.39 | 0.00 | 0.02 |
| Solyc12g042600.2 | 1.23                | 2.34 | 0.00 | 0.01 |
| Solyc07g054840.3 | 1.22                | 2.34 | 0.00 | 0.01 |
| Solyc00g272810.1 | 1.18                | 2.26 | 0.00 | 0.00 |
| Solyc04g078900.3 | 1.17                | 2.25 | 0.00 | 0.03 |
| Solyc02g079290.3 | 1.16                | 2.23 | 0.00 | 0.02 |
| Solyc10g055460.2 | 1.14                | 2.21 | 0.00 | 0.00 |
| Solyc05g024410.3 | 1.13                | 2.19 | 0.00 | 0.01 |
| Solyc05g050220.3 | 1.11                | 2.16 | 0.00 | 0.00 |
| Solyc05g055460.1 | 1.10                | 2.15 | 0.00 | 0.00 |
| Solyc04g009910.3 | 1.06                | 2.09 | 0.00 | 0.00 |
| Solyc10g084910.2 | 1.06                | 2.08 | 0.00 | 0.02 |
| Solyc04g071770.3 | 1.05                | 2.07 | 0.00 | 0.00 |
| Solyc03g025720.3 | 1.03                | 2.04 | 0.00 | 0.01 |
| Solyc06g072870.2 | 1.01                | 2.01 | 0.00 | 0.00 |
| Solyc12g010820.2 | 0.98                | 1.97 | 0.00 | 0.02 |
| Novel00183       | 0.96                | 1.95 | 0.00 | 0.00 |
| Solyc02g083000.1 | 0.96                | 1.94 | 0.00 | 0.03 |
| Solyc04g007470.3 | 0.95                | 1.93 | 0.00 | 0.01 |
| Solyc06g066540.1 | 0.95                | 1.93 | 0.00 | 0.00 |
| Solyc02g081340.3 | 0.94                | 1.92 | 0.00 | 0.01 |
| Solyc07g040680.3 | 0.94                | 1.92 | 0.00 | 0.00 |
| Solyc04g076710.3 | 0.92                | 1.90 | 0.00 | 0.00 |
| Solyc06g076400.3 | 0.92                | 1.89 | 0.00 | 0.00 |
| Solyc12g044390.2 | 0.90                | 1.87 | 0.00 | 0.02 |
| Solyc01g109120.3 | 0.90                | 1.87 | 0.00 | 0.00 |
| Solyc01g006720.3 | 0.90                | 1.86 | 0.00 | 0.00 |
| Solyc11g066880.2 | 0.88                | 1.84 | 0.00 | 0.00 |
| Solyc09g097960.3 | 0.88                | 1.84 | 0.00 | 0.00 |
| Solyc12g006050.2 | 0.86                | 1.81 | 0.00 | 0.02 |

|                  |      |      |      |      |
|------------------|------|------|------|------|
| Solyc11g010930.2 | 0.85 | 1.81 | 0.00 | 0.01 |
| Solyc08g013900.3 | 0.85 | 1.80 | 0.00 | 0.00 |
| Solyc04g005380.3 | 0.84 | 1.80 | 0.00 | 0.00 |
| Solyc02g089190.2 | 0.84 | 1.79 | 0.00 | 0.00 |
| Solyc08g075320.3 | 0.84 | 1.78 | 0.00 | 0.00 |
| Solyc03g111100.1 | 0.83 | 1.77 | 0.00 | 0.00 |
| Solyc06g084330.3 | 0.83 | 1.77 | 0.00 | 0.00 |
| Solyc10g081840.2 | 0.82 | 1.77 | 0.00 | 0.00 |
| Solyc08g005610.3 | 0.82 | 1.76 | 0.00 | 0.00 |
| Solyc01g087590.3 | 0.81 | 1.76 | 0.00 | 0.00 |
| Solyc06g072710.3 | 0.81 | 1.76 | 0.00 | 0.00 |
| Solyc12g006640.2 | 0.81 | 1.75 | 0.00 | 0.04 |
| Solyc04g015200.3 | 0.80 | 1.75 | 0.00 | 0.00 |
| Solyc05g054890.3 | 0.78 | 1.72 | 0.00 | 0.05 |
| Solyc07g062520.3 | 0.78 | 1.72 | 0.00 | 0.02 |
| Solyc10g080730.2 | 0.78 | 1.71 | 0.00 | 0.00 |
| Solyc11g005930.2 | 0.77 | 1.70 | 0.00 | 0.05 |
| Solyc04g071140.3 | 0.77 | 1.70 | 0.00 | 0.00 |
| Solyc01g096320.3 | 0.76 | 1.70 | 0.00 | 0.00 |
| Solyc05g009320.3 | 0.76 | 1.70 | 0.00 | 0.01 |
| Solyc03g118450.1 | 0.76 | 1.70 | 0.00 | 0.01 |
| Solyc11g011970.2 | 0.76 | 1.69 | 0.00 | 0.00 |
| Solyc06g051550.3 | 0.74 | 1.67 | 0.00 | 0.00 |
| Solyc07g006130.2 | 0.74 | 1.67 | 0.00 | 0.00 |
| Solyc04g081900.3 | 0.74 | 1.66 | 0.00 | 0.01 |
| Solyc04g076950.3 | 0.73 | 1.66 | 0.00 | 0.00 |
| Solyc09g009150.1 | 0.73 | 1.66 | 0.00 | 0.00 |
| Solyc01g096280.2 | 0.71 | 1.64 | 0.00 | 0.00 |
| Solyc01g080580.3 | 0.71 | 1.64 | 0.00 | 0.00 |
| Solyc03g120020.3 | 0.71 | 1.63 | 0.00 | 0.01 |
| Solyc04g072890.3 | 0.70 | 1.63 | 0.00 | 0.04 |
| Novel00572       | 0.70 | 1.63 | 0.00 | 0.00 |
| Solyc03g115850.3 | 0.70 | 1.62 | 0.00 | 0.01 |
| Solyc04g074950.3 | 0.70 | 1.62 | 0.00 | 0.01 |
| Solyc12g013620.2 | 0.70 | 1.62 | 0.00 | 0.01 |
| Solyc12g088230.2 | 0.70 | 1.62 | 0.00 | 0.00 |
| Solyc03g096670.3 | 0.69 | 1.62 | 0.00 | 0.00 |
| Solyc07g065060.2 | 0.68 | 1.61 | 0.00 | 0.04 |
| Solyc08g075280.3 | 0.68 | 1.60 | 0.00 | 0.01 |
| Solyc01g107240.3 | 0.68 | 1.60 | 0.00 | 0.02 |
| Solyc03g116530.3 | 0.67 | 1.59 | 0.00 | 0.03 |
| Solyc02g078210.3 | 0.67 | 1.59 | 0.00 | 0.03 |
| Solyc06g048750.3 | 0.67 | 1.59 | 0.00 | 0.03 |
| Solyc12g095810.2 | 0.64 | 1.56 | 0.00 | 0.00 |
| Solyc01g107170.2 | 0.64 | 1.56 | 0.00 | 0.04 |
| Solyc07g063420.3 | 0.64 | 1.56 | 0.00 | 0.03 |
| Solyc06g010060.1 | 0.64 | 1.56 | 0.00 | 0.00 |
| Solyc10g005460.3 | 0.64 | 1.55 | 0.00 | 0.00 |
| Solyc11g010170.2 | 0.63 | 1.55 | 0.00 | 0.01 |

|                  |      |      |      |      |
|------------------|------|------|------|------|
| Solyc03g007370.3 | 0.63 | 1.55 | 0.00 | 0.00 |
| Solyc02g093890.1 | 0.63 | 1.55 | 0.00 | 0.01 |
| Solyc03g116280.3 | 0.63 | 1.55 | 0.00 | 0.00 |
| Solyc07g064900.3 | 0.63 | 1.54 | 0.00 | 0.00 |
| Solyc10g083670.2 | 0.63 | 1.54 | 0.00 | 0.00 |
| Solyc03g118130.3 | 0.63 | 1.54 | 0.00 | 0.04 |
| Solyc02g090890.3 | 0.62 | 1.54 | 0.00 | 0.00 |
| Solyc08g065500.2 | 0.62 | 1.54 | 0.00 | 0.00 |
| Solyc03g120640.3 | 0.62 | 1.54 | 0.00 | 0.00 |
| Solyc10g007070.3 | 0.61 | 1.53 | 0.00 | 0.00 |
| Solyc06g071060.2 | 0.61 | 1.53 | 0.00 | 0.00 |
| Solyc04g072895.1 | 0.61 | 1.53 | 0.00 | 0.00 |
| Solyc11g016940.2 | 0.61 | 1.53 | 0.00 | 0.02 |
| Solyc03g116710.3 | 0.61 | 1.52 | 0.00 | 0.01 |
| Solyc07g006850.2 | 0.61 | 1.52 | 0.00 | 0.00 |
| Solyc05g008390.3 | 0.61 | 1.52 | 0.00 | 0.01 |
| Solyc08g007080.3 | 0.61 | 1.52 | 0.00 | 0.00 |
| Solyc12g007070.2 | 0.60 | 1.52 | 0.00 | 0.00 |
| Solyc01g058260.3 | 0.60 | 1.51 | 0.00 | 0.00 |
| Solyc02g088910.3 | 0.60 | 1.51 | 0.00 | 0.00 |
| Solyc09g065020.3 | 0.59 | 1.51 | 0.00 | 0.05 |
| Solyc07g065810.2 | 0.59 | 1.51 | 0.00 | 0.01 |
| Solyc03g121880.3 | 0.59 | 1.51 | 0.00 | 0.00 |
| Solyc04g081290.3 | 0.59 | 1.50 | 0.00 | 0.00 |
| Solyc02g071090.3 | 0.59 | 1.50 | 0.00 | 0.03 |
| Solyc04g054930.3 | 0.59 | 1.50 | 0.00 | 0.00 |
| Solyc02g076920.3 | 0.58 | 1.50 | 0.00 | 0.00 |
| Solyc02g081330.3 | 0.58 | 1.49 | 0.00 | 0.00 |
| Solyc04g056310.3 | 0.58 | 1.49 | 0.00 | 0.00 |
| Solyc09g090790.3 | 0.57 | 1.49 | 0.00 | 0.00 |
| Solyc09g005660.3 | 0.57 | 1.48 | 0.00 | 0.00 |
| Solyc03g116270.3 | 0.57 | 1.48 | 0.00 | 0.00 |
| Solyc04g076820.1 | 0.56 | 1.47 | 0.00 | 0.00 |
| Solyc04g053130.3 | 0.56 | 1.47 | 0.00 | 0.05 |
| Solyc11g008030.2 | 0.55 | 1.47 | 0.00 | 0.03 |
| Solyc10g079620.2 | 0.55 | 1.47 | 0.00 | 0.00 |
| Solyc04g077980.1 | 0.54 | 1.46 | 0.00 | 0.00 |
| Solyc02g081170.3 | 0.54 | 1.45 | 0.00 | 0.00 |
| Solyc04g008210.2 | 0.54 | 1.45 | 0.00 | 0.00 |
| Solyc01g111570.3 | 0.53 | 1.45 | 0.00 | 0.00 |
| Solyc01g096880.3 | 0.53 | 1.45 | 0.00 | 0.00 |
| Solyc05g052980.3 | 0.53 | 1.44 | 0.00 | 0.01 |
| Solyc02g070670.3 | 0.53 | 1.44 | 0.00 | 0.00 |
| Solyc12g089220.2 | 0.53 | 1.44 | 0.00 | 0.00 |
| Solyc01g009935.1 | 0.52 | 1.44 | 0.00 | 0.01 |
| Novel00122       | 0.52 | 1.43 | 0.00 | 0.02 |
| Solyc12g005880.2 | 0.52 | 1.43 | 0.00 | 0.02 |
| Solyc11g010120.2 | 0.52 | 1.43 | 0.00 | 0.00 |
| Solyc01g106253.1 | 0.52 | 1.43 | 0.00 | 0.04 |



|                  |      |      |      |      |
|------------------|------|------|------|------|
| Solyc11g013083.1 | 0.51 | 1.43 | 0.00 | 0.01 |
| Solyc07g043590.3 | 0.51 | 1.43 | 0.00 | 0.00 |
| Solyc02g090310.1 | 0.51 | 1.43 | 0.00 | 0.00 |
| Solyc02g086860.3 | 0.51 | 1.42 | 0.00 | 0.00 |
| Solyc02g085610.3 | 0.51 | 1.42 | 0.00 | 0.00 |
| Solyc03g121870.3 | 0.51 | 1.42 | 0.00 | 0.03 |
| Solyc11g018690.2 | 0.51 | 1.42 | 0.00 | 0.00 |
| Solyc10g080980.2 | 0.51 | 1.42 | 0.00 | 0.01 |
| Solyc05g012210.3 | 0.50 | 1.42 | 0.00 | 0.00 |
| Solyc04g078730.2 | 0.50 | 1.42 | 0.00 | 0.01 |
| Solyc03g095310.3 | 0.50 | 1.42 | 0.00 | 0.03 |
| Solyc04g016060.1 | 0.50 | 1.42 | 0.00 | 0.00 |
| Solyc02g079280.3 | 0.50 | 1.41 | 0.00 | 0.02 |
| Solyc03g093270.3 | 0.50 | 1.41 | 0.00 | 0.03 |
| Solyc04g081020.3 | 0.50 | 1.41 | 0.00 | 0.01 |
| Solyc04g078360.2 | 0.50 | 1.41 | 0.00 | 0.00 |
| Solyc01g079865.1 | 0.50 | 1.41 | 0.00 | 0.02 |
| Solyc07g065250.3 | 0.49 | 1.41 | 0.00 | 0.00 |
| Solyc02g094180.3 | 0.49 | 1.41 | 0.00 | 0.03 |
| Solyc09g011370.2 | 0.49 | 1.41 | 0.00 | 0.00 |
| Solyc08g065610.3 | 0.49 | 1.41 | 0.00 | 0.00 |
| Solyc08g067310.1 | 0.49 | 1.41 | 0.00 | 0.02 |
| Solyc07g040990.3 | 0.49 | 1.40 | 0.00 | 0.00 |
| Solyc10g083460.1 | 0.49 | 1.40 | 0.00 | 0.04 |
| Solyc11g045610.2 | 0.49 | 1.40 | 0.00 | 0.01 |
| Solyc06g005070.2 | 0.48 | 1.40 | 0.00 | 0.04 |
| Solyc12g013810.2 | 0.48 | 1.40 | 0.00 | 0.01 |
| Solyc06g066600.3 | 0.48 | 1.40 | 0.00 | 0.02 |
| Solyc12g019740.2 | 0.47 | 1.39 | 0.00 | 0.02 |
| Solyc08g023440.3 | 0.47 | 1.39 | 0.00 | 0.00 |
| Solyc04g078850.3 | 0.47 | 1.39 | 0.00 | 0.01 |
| Solyc06g007120.3 | 0.47 | 1.39 | 0.00 | 0.00 |
| Solyc01g103990.3 | 0.47 | 1.39 | 0.00 | 0.03 |
| Solyc11g005560.2 | 0.47 | 1.39 | 0.00 | 0.00 |
| Solyc01g108840.3 | 0.47 | 1.39 | 0.00 | 0.01 |
| Solyc04g079300.3 | 0.47 | 1.39 | 0.00 | 0.00 |
| Solyc06g005470.3 | 0.47 | 1.39 | 0.00 | 0.04 |
| Solyc02g085670.3 | 0.47 | 1.38 | 0.00 | 0.02 |
| Solyc01g095460.3 | 0.46 | 1.38 | 0.00 | 0.00 |
| Solyc01g079650.3 | 0.46 | 1.38 | 0.00 | 0.01 |
| Solyc02g089115.1 | 0.46 | 1.37 | 0.00 | 0.01 |
| Solyc06g053960.3 | 0.46 | 1.37 | 0.00 | 0.01 |
| Solyc07g016170.3 | 0.45 | 1.37 | 0.00 | 0.00 |
| Solyc03g113270.3 | 0.45 | 1.37 | 0.00 | 0.00 |
| Solyc05g006980.3 | 0.45 | 1.37 | 0.00 | 0.00 |
| Solyc06g050300.2 | 0.45 | 1.37 | 0.00 | 0.02 |
| Solyc02g089120.3 | 0.45 | 1.36 | 0.00 | 0.02 |
| Solyc08g077440.3 | 0.45 | 1.36 | 0.00 | 0.02 |
| Solyc06g068450.2 | 0.45 | 1.36 | 0.00 | 0.00 |

|                  |      |      |      |      |
|------------------|------|------|------|------|
| Solyc04g054370.1 | 0.44 | 1.36 | 0.00 | 0.03 |
| Solyc01g006780.3 | 0.44 | 1.36 | 0.00 | 0.00 |
| Solyc06g062960.2 | 0.44 | 1.36 | 0.00 | 0.04 |
| Solyc12g006930.2 | 0.44 | 1.36 | 0.00 | 0.04 |
| Solyc12g008660.1 | 0.44 | 1.36 | 0.00 | 0.00 |
| Solyc03g044910.1 | 0.44 | 1.36 | 0.00 | 0.00 |
| Solyc09g092460.3 | 0.44 | 1.36 | 0.00 | 0.00 |
| Solyc02g091930.3 | 0.44 | 1.36 | 0.00 | 0.00 |
| Solyc03g115980.1 | 0.44 | 1.35 | 0.00 | 0.04 |
| Solyc07g044990.3 | 0.44 | 1.35 | 0.00 | 0.01 |
| Solyc12g038160.2 | 0.44 | 1.35 | 0.00 | 0.00 |
| Solyc05g024160.3 | 0.43 | 1.35 | 0.00 | 0.00 |
| Solyc11g012000.2 | 0.43 | 1.35 | 0.00 | 0.00 |
| Solyc02g069470.3 | 0.43 | 1.35 | 0.00 | 0.01 |
| Solyc01g096420.3 | 0.43 | 1.35 | 0.00 | 0.00 |
| Solyc05g007220.3 | 0.43 | 1.35 | 0.00 | 0.04 |
| Solyc02g085700.2 | 0.43 | 1.35 | 0.00 | 0.00 |
| Solyc09g075560.1 | 0.43 | 1.35 | 0.00 | 0.00 |
| Solyc03g117070.1 | 0.43 | 1.35 | 0.00 | 0.01 |
| Solyc12g089240.2 | 0.43 | 1.35 | 0.00 | 0.00 |
| Solyc01g006790.2 | 0.43 | 1.35 | 0.00 | 0.01 |
| Solyc01g079160.3 | 0.43 | 1.34 | 0.00 | 0.05 |
| Solyc12g056590.2 | 0.43 | 1.34 | 0.00 | 0.05 |
| Solyc08g082870.3 | 0.43 | 1.34 | 0.00 | 0.02 |
| Solyc01g010660.3 | 0.42 | 1.34 | 0.00 | 0.03 |
| Solyc05g014260.3 | 0.42 | 1.34 | 0.00 | 0.00 |
| Solyc06g068720.3 | 0.42 | 1.34 | 0.00 | 0.02 |
| Solyc06g074940.3 | 0.42 | 1.34 | 0.00 | 0.02 |
| Solyc04g006960.3 | 0.42 | 1.34 | 0.00 | 0.00 |
| Solyc09g075020.3 | 0.41 | 1.33 | 0.00 | 0.00 |
| Solyc01g108087.1 | 0.41 | 1.33 | 0.00 | 0.01 |
| Solyc02g078830.3 | 0.41 | 1.33 | 0.00 | 0.02 |
| Solyc04g063380.3 | 0.41 | 1.33 | 0.00 | 0.01 |
| Solyc12g015770.2 | 0.41 | 1.33 | 0.00 | 0.01 |
| Solyc04g054320.3 | 0.41 | 1.33 | 0.00 | 0.00 |
| Solyc01g097470.3 | 0.41 | 1.32 | 0.00 | 0.03 |
| Solyc09g074660.3 | 0.41 | 1.32 | 0.00 | 0.04 |
| Solyc01g105270.3 | 0.40 | 1.32 | 0.00 | 0.05 |
| Solyc07g054270.3 | 0.40 | 1.32 | 0.00 | 0.05 |
| Solyc02g071860.3 | 0.40 | 1.32 | 0.00 | 0.01 |
| Solyc02g091430.3 | 0.40 | 1.32 | 0.00 | 0.00 |
| Solyc07g024000.3 | 0.40 | 1.32 | 0.00 | 0.02 |
| Solyc03g007960.3 | 0.40 | 1.32 | 0.00 | 0.01 |
| Solyc12g005850.2 | 0.40 | 1.32 | 0.00 | 0.04 |
| Solyc05g015610.3 | 0.40 | 1.32 | 0.00 | 0.00 |
| Solyc05g013660.3 | 0.39 | 1.31 | 0.00 | 0.03 |
| Solyc02g083310.3 | 0.39 | 1.31 | 0.00 | 0.01 |
| Solyc05g021390.3 | 0.39 | 1.31 | 0.00 | 0.03 |
| Solyc02g084610.1 | 0.39 | 1.31 | 0.00 | 0.04 |

|                  |       |      |      |      |
|------------------|-------|------|------|------|
| Solyc04g025940.3 | 0.39  | 1.31 | 0.00 | 0.01 |
| Solyc11g013180.2 | 0.39  | 1.31 | 0.00 | 0.00 |
| Solyc03g083615.1 | 0.39  | 1.31 | 0.00 | 0.02 |
| Solyc03g118425.1 | 0.39  | 1.31 | 0.00 | 0.05 |
| Solyc08g081030.1 | 0.39  | 1.31 | 0.00 | 0.01 |
| Solyc01g111260.2 | 0.39  | 1.31 | 0.00 | 0.01 |
| Solyc02g081030.3 | 0.38  | 1.30 | 0.00 | 0.01 |
| Solyc08g061920.2 | 0.38  | 1.30 | 0.00 | 0.04 |
| Solyc01g087240.3 | 0.38  | 1.30 | 0.00 | 0.02 |
| Solyc12g056650.2 | 0.38  | 1.30 | 0.00 | 0.01 |
| Solyc07g007120.3 | 0.38  | 1.30 | 0.00 | 0.01 |
| Solyc01g079870.3 | 0.37  | 1.30 | 0.00 | 0.01 |
| Solyc00g009110.3 | 0.37  | 1.30 | 0.00 | 0.03 |
| Solyc01g099980.3 | 0.37  | 1.30 | 0.00 | 0.01 |
| Solyc04g079190.3 | 0.37  | 1.29 | 0.00 | 0.03 |
| Solyc03g121960.3 | 0.37  | 1.29 | 0.00 | 0.03 |
| Solyc01g067280.3 | 0.37  | 1.29 | 0.00 | 0.02 |
| Solyc11g069580.2 | 0.37  | 1.29 | 0.00 | 0.04 |
| Solyc11g072660.2 | 0.36  | 1.29 | 0.00 | 0.02 |
| Solyc12g089160.2 | 0.36  | 1.29 | 0.00 | 0.04 |
| Solyc11g073300.2 | 0.36  | 1.28 | 0.00 | 0.03 |
| Solyc10g007030.2 | 0.36  | 1.28 | 0.00 | 0.02 |
| Solyc03g119610.1 | 0.36  | 1.28 | 0.00 | 0.02 |
| Solyc04g074580.1 | 0.36  | 1.28 | 0.00 | 0.01 |
| Solyc04g012160.3 | 0.35  | 1.28 | 0.00 | 0.03 |
| Solyc03g007270.3 | 0.35  | 1.28 | 0.00 | 0.02 |
| Solyc06g050130.3 | 0.35  | 1.28 | 0.00 | 0.03 |
| Solyc05g015390.3 | 0.35  | 1.28 | 0.00 | 0.01 |
| Solyc12g005270.2 | 0.35  | 1.27 | 0.00 | 0.01 |
| Solyc08g077780.3 | 0.35  | 1.27 | 0.00 | 0.01 |
| Solyc12g006230.2 | 0.35  | 1.27 | 0.00 | 0.03 |
| Solyc06g076350.3 | 0.35  | 1.27 | 0.00 | 0.03 |
| Solyc07g052670.3 | 0.34  | 1.27 | 0.00 | 0.01 |
| Solyc10g076480.2 | 0.34  | 1.27 | 0.00 | 0.03 |
| Solyc03g097630.3 | 0.34  | 1.27 | 0.00 | 0.05 |
| Solyc11g013750.2 | 0.34  | 1.26 | 0.00 | 0.03 |
| Solyc01g106780.3 | 0.33  | 1.26 | 0.00 | 0.05 |
| Solyc04g080790.3 | 0.33  | 1.26 | 0.00 | 0.03 |
| Solyc08g074390.3 | 0.33  | 1.26 | 0.00 | 0.05 |
| Solyc01g095620.3 | 0.33  | 1.26 | 0.00 | 0.02 |
| Solyc03g111640.3 | 0.33  | 1.25 | 0.00 | 0.03 |
| Solyc09g008790.3 | 0.32  | 1.25 | 0.00 | 0.04 |
| Solyc03g111310.3 | 0.32  | 1.25 | 0.00 | 0.03 |
| Solyc11g072540.2 | 0.32  | 1.25 | 0.00 | 0.04 |
| Solyc01g086970.3 | 0.31  | 1.24 | 0.00 | 0.05 |
| Solyc06g082530.2 | 0.30  | 1.23 | 0.00 | 0.04 |
| Solyc03g123620.3 | -0.31 | 0.81 | 0.00 | 0.03 |
| Solyc12g045030.2 | -0.33 | 0.80 | 0.00 | 0.03 |
| Solyc12g005940.2 | -0.33 | 0.79 | 0.00 | 0.04 |

|                  |       |      |      |      |
|------------------|-------|------|------|------|
| Solyc04g008680.3 | -0.35 | 0.79 | 0.00 | 0.02 |
| Solyc08g007620.2 | -0.36 | 0.78 | 0.00 | 0.03 |
| Solyc09g091670.3 | -0.36 | 0.78 | 0.00 | 0.01 |
| Solyc03g093260.3 | -0.36 | 0.78 | 0.00 | 0.05 |
| Solyc01g010230.2 | -0.37 | 0.78 | 0.00 | 0.02 |
| Solyc03g097490.3 | -0.37 | 0.78 | 0.00 | 0.04 |
| Solyc01g103650.3 | -0.37 | 0.77 | 0.00 | 0.03 |
| Solyc02g078670.3 | -0.37 | 0.77 | 0.00 | 0.01 |
| Solyc02g087980.3 | -0.37 | 0.77 | 0.00 | 0.04 |
| Solyc04g008040.3 | -0.37 | 0.77 | 0.00 | 0.02 |
| Solyc07g065880.3 | -0.37 | 0.77 | 0.00 | 0.03 |
| Solyc05g054480.3 | -0.38 | 0.77 | 0.00 | 0.02 |
| Solyc09g010850.3 | -0.38 | 0.77 | 0.00 | 0.03 |
| Solyc04g080600.3 | -0.38 | 0.77 | 0.00 | 0.04 |
| Solyc10g007290.3 | -0.40 | 0.76 | 0.00 | 0.00 |
| Solyc08g008370.3 | -0.40 | 0.76 | 0.00 | 0.01 |
| Solyc03g083240.3 | -0.41 | 0.75 | 0.00 | 0.02 |
| Solyc06g075580.3 | -0.41 | 0.75 | 0.00 | 0.02 |
| Solyc01g073950.3 | -0.42 | 0.75 | 0.00 | 0.02 |
| Solyc06g076040.3 | -0.42 | 0.75 | 0.00 | 0.00 |
| Solyc03g033500.3 | -0.42 | 0.75 | 0.00 | 0.03 |
| Solyc02g067660.3 | -0.42 | 0.75 | 0.00 | 0.01 |
| Solyc11g007770.2 | -0.42 | 0.75 | 0.00 | 0.02 |
| Solyc06g059870.1 | -0.42 | 0.75 | 0.00 | 0.01 |
| Solyc01g014840.3 | -0.43 | 0.74 | 0.00 | 0.02 |
| Solyc11g007900.2 | -0.43 | 0.74 | 0.00 | 0.02 |
| Solyc11g012410.2 | -0.43 | 0.74 | 0.00 | 0.00 |
| Solyc01g081540.3 | -0.43 | 0.74 | 0.00 | 0.02 |
| Solyc11g072570.2 | -0.44 | 0.74 | 0.00 | 0.03 |
| Solyc11g007580.2 | -0.44 | 0.74 | 0.00 | 0.02 |
| Solyc12g005790.2 | -0.44 | 0.74 | 0.00 | 0.00 |
| Solyc03g058380.3 | -0.44 | 0.74 | 0.00 | 0.00 |
| Solyc07g032230.3 | -0.44 | 0.74 | 0.00 | 0.00 |
| Solyc01g058010.3 | -0.44 | 0.74 | 0.00 | 0.01 |
| Solyc03g119220.3 | -0.44 | 0.73 | 0.00 | 0.02 |
| Solyc09g009080.3 | -0.45 | 0.73 | 0.00 | 0.00 |
| Solyc10g008400.2 | -0.45 | 0.73 | 0.00 | 0.02 |
| Solyc01g111980.3 | -0.45 | 0.73 | 0.00 | 0.00 |
| Solyc03g083010.3 | -0.45 | 0.73 | 0.00 | 0.01 |
| Solyc06g009783.1 | -0.46 | 0.73 | 0.00 | 0.03 |
| Solyc03g045050.3 | -0.46 | 0.73 | 0.00 | 0.00 |
| Solyc03g097190.3 | -0.46 | 0.73 | 0.00 | 0.00 |
| Solyc05g005620.3 | -0.47 | 0.72 | 0.00 | 0.00 |
| Solyc02g077710.1 | -0.47 | 0.72 | 0.00 | 0.02 |
| Solyc10g005000.3 | -0.47 | 0.72 | 0.00 | 0.00 |
| Solyc12g005590.2 | -0.47 | 0.72 | 0.00 | 0.00 |
| Solyc03g058350.3 | -0.47 | 0.72 | 0.00 | 0.00 |
| Solyc10g008790.3 | -0.47 | 0.72 | 0.00 | 0.04 |
| Solyc06g005170.3 | -0.47 | 0.72 | 0.00 | 0.00 |

|                  |       |      |      |      |
|------------------|-------|------|------|------|
| Solyc06g060680.2 | -0.47 | 0.72 | 0.00 | 0.00 |
| Solyc12g098840.2 | -0.47 | 0.72 | 0.00 | 0.00 |
| Solyc05g007110.2 | -0.47 | 0.72 | 0.00 | 0.04 |
| Solyc03g119940.3 | -0.47 | 0.72 | 0.00 | 0.02 |
| Solyc03g005620.3 | -0.47 | 0.72 | 0.00 | 0.04 |
| Solyc05g053770.3 | -0.48 | 0.72 | 0.00 | 0.01 |
| Solyc12g011290.2 | -0.48 | 0.72 | 0.00 | 0.01 |
| Solyc05g011970.3 | -0.48 | 0.72 | 0.00 | 0.02 |
| Solyc06g008400.2 | -0.48 | 0.71 | 0.00 | 0.01 |
| Solyc12g100270.2 | -0.49 | 0.71 | 0.00 | 0.00 |
| Solyc05g008780.3 | -0.49 | 0.71 | 0.00 | 0.00 |
| Solyc02g085035.1 | -0.49 | 0.71 | 0.00 | 0.00 |
| Solyc07g006320.3 | -0.50 | 0.71 | 0.00 | 0.01 |
| Solyc04g007070.3 | -0.50 | 0.71 | 0.00 | 0.01 |
| Solyc11g006640.2 | -0.50 | 0.71 | 0.00 | 0.03 |
| Solyc11g010920.2 | -0.50 | 0.71 | 0.00 | 0.01 |
| Solyc06g067870.3 | -0.50 | 0.70 | 0.00 | 0.00 |
| Solyc08g007970.3 | -0.51 | 0.70 | 0.00 | 0.00 |
| Solyc06g062330.2 | -0.51 | 0.70 | 0.00 | 0.01 |
| Solyc06g008790.3 | -0.51 | 0.70 | 0.00 | 0.01 |
| Solyc04g071660.3 | -0.51 | 0.70 | 0.00 | 0.00 |
| Solyc04g072450.3 | -0.51 | 0.70 | 0.00 | 0.00 |
| Solyc03g119250.3 | -0.52 | 0.70 | 0.00 | 0.04 |
| Solyc07g018070.3 | -0.52 | 0.70 | 0.00 | 0.00 |
| Solyc09g091960.3 | -0.52 | 0.70 | 0.00 | 0.02 |
| Solyc06g072730.3 | -0.52 | 0.70 | 0.00 | 0.02 |
| Solyc03g115920.3 | -0.52 | 0.70 | 0.00 | 0.04 |
| Solyc05g044490.2 | -0.53 | 0.69 | 0.00 | 0.03 |
| Solyc08g080780.3 | -0.53 | 0.69 | 0.00 | 0.00 |
| Solyc11g069070.2 | -0.53 | 0.69 | 0.00 | 0.01 |
| Solyc04g081470.3 | -0.53 | 0.69 | 0.00 | 0.01 |
| Solyc11g071730.2 | -0.53 | 0.69 | 0.00 | 0.04 |
| Solyc07g056170.3 | -0.54 | 0.69 | 0.00 | 0.00 |
| Solyc11g071300.2 | -0.54 | 0.69 | 0.00 | 0.02 |
| Solyc02g062890.2 | -0.54 | 0.69 | 0.00 | 0.02 |
| Solyc04g071360.3 | -0.54 | 0.69 | 0.00 | 0.01 |
| Solyc01g057310.3 | -0.54 | 0.69 | 0.00 | 0.05 |
| Solyc11g008080.2 | -0.55 | 0.69 | 0.00 | 0.02 |
| Solyc09g005860.3 | -0.55 | 0.68 | 0.00 | 0.00 |
| Solyc04g015220.3 | -0.55 | 0.68 | 0.00 | 0.04 |
| Solyc03g032210.3 | -0.55 | 0.68 | 0.00 | 0.00 |
| Solyc05g006730.3 | -0.55 | 0.68 | 0.00 | 0.00 |
| Solyc10g083630.2 | -0.56 | 0.68 | 0.00 | 0.00 |
| Solyc04g025650.3 | -0.56 | 0.68 | 0.00 | 0.00 |
| Solyc06g082030.3 | -0.56 | 0.68 | 0.00 | 0.03 |
| Solyc03g119600.1 | -0.56 | 0.68 | 0.00 | 0.00 |
| Solyc10g018200.2 | -0.56 | 0.68 | 0.00 | 0.03 |
| Solyc11g044340.2 | -0.58 | 0.67 | 0.00 | 0.00 |
| Solyc04g015210.3 | -0.58 | 0.67 | 0.00 | 0.00 |

|                  |       |      |      |      |
|------------------|-------|------|------|------|
| Solyc07g065600.3 | -0.58 | 0.67 | 0.00 | 0.00 |
| Solyc02g093720.3 | -0.59 | 0.67 | 0.00 | 0.01 |
| Solyc12g014590.2 | -0.59 | 0.67 | 0.00 | 0.00 |
| Solyc02g021260.2 | -0.59 | 0.67 | 0.00 | 0.03 |
| Solyc12g014030.1 | -0.60 | 0.66 | 0.00 | 0.03 |
| Solyc12g009480.2 | -0.60 | 0.66 | 0.00 | 0.03 |
| Solyc05g010680.2 | -0.60 | 0.66 | 0.00 | 0.01 |
| Solyc07g053640.1 | -0.61 | 0.65 | 0.00 | 0.01 |
| Solyc04g007030.3 | -0.62 | 0.65 | 0.00 | 0.01 |
| Solyc08g082010.3 | -0.62 | 0.65 | 0.00 | 0.02 |
| Solyc07g041290.2 | -0.63 | 0.65 | 0.00 | 0.00 |
| Solyc07g009030.3 | -0.63 | 0.65 | 0.00 | 0.00 |
| Solyc02g071560.3 | -0.64 | 0.64 | 0.00 | 0.02 |
| Solyc12g013790.2 | -0.65 | 0.64 | 0.00 | 0.00 |
| Solyc07g065490.3 | -0.65 | 0.64 | 0.00 | 0.00 |
| Solyc12g014040.1 | -0.66 | 0.64 | 0.00 | 0.00 |
| Solyc05g014270.3 | -0.67 | 0.63 | 0.00 | 0.01 |
| Solyc02g069750.2 | -0.67 | 0.63 | 0.00 | 0.00 |
| Solyc01g108670.3 | -0.70 | 0.62 | 0.00 | 0.00 |
| Solyc05g055220.1 | -0.71 | 0.61 | 0.00 | 0.04 |
| Solyc01g102310.3 | -0.73 | 0.60 | 0.00 | 0.05 |
| Solyc04g005170.1 | -0.73 | 0.60 | 0.00 | 0.04 |
| Solyc12g036390.2 | -0.74 | 0.60 | 0.00 | 0.00 |
| Solyc12g005480.2 | -0.74 | 0.60 | 0.00 | 0.02 |
| Solyc07g049560.3 | -0.75 | 0.59 | 0.00 | 0.00 |
| Solyc01g057320.2 | -0.76 | 0.59 | 0.00 | 0.01 |
| Solyc01g100270.3 | -0.76 | 0.59 | 0.00 | 0.00 |
| Solyc06g072660.3 | -0.77 | 0.58 | 0.00 | 0.01 |
| Solyc06g016750.3 | -0.78 | 0.58 | 0.00 | 0.03 |
| Solyc06g069300.1 | -0.79 | 0.58 | 0.00 | 0.01 |
| Solyc04g082120.3 | -0.79 | 0.58 | 0.00 | 0.04 |
| Solyc01g090210.3 | -0.83 | 0.56 | 0.00 | 0.00 |
| Solyc06g059990.3 | -0.84 | 0.56 | 0.00 | 0.00 |
| Solyc05g007470.3 | -0.84 | 0.56 | 0.00 | 0.00 |
| Solyc03g123390.3 | -0.84 | 0.56 | 0.00 | 0.00 |
| Solyc09g010550.3 | -0.86 | 0.55 | 0.00 | 0.00 |
| Solyc08g082070.3 | -0.87 | 0.55 | 0.00 | 0.00 |
| Solyc03g093340.3 | -0.87 | 0.55 | 0.00 | 0.04 |
| Solyc08g007800.3 | -0.88 | 0.54 | 0.00 | 0.01 |
| Solyc07g008980.3 | -0.89 | 0.54 | 0.00 | 0.01 |
| Solyc04g082220.2 | -0.89 | 0.54 | 0.00 | 0.02 |
| Solyc09g091910.2 | -0.91 | 0.53 | 0.00 | 0.00 |
| Solyc07g006290.2 | -0.91 | 0.53 | 0.00 | 0.01 |
| Solyc10g085100.2 | -0.95 | 0.52 | 0.00 | 0.00 |
| Solyc02g091890.2 | -0.96 | 0.51 | 0.00 | 0.00 |
| Solyc10g007280.3 | -0.96 | 0.51 | 0.00 | 0.00 |
| Solyc11g010620.2 | -0.97 | 0.51 | 0.00 | 0.00 |
| Solyc07g054220.1 | -0.99 | 0.50 | 0.00 | 0.00 |
| Solyc08g060920.3 | -0.99 | 0.50 | 0.00 | 0.02 |

|                  |       |      |      |      |
|------------------|-------|------|------|------|
| Solyc03g025830.3 | -0.99 | 0.50 | 0.00 | 0.00 |
| Solyc10g006000.3 | -1.01 | 0.50 | 0.00 | 0.00 |
| Solyc08g066720.2 | -1.05 | 0.48 | 0.00 | 0.02 |
| Solyc05g009640.3 | -1.10 | 0.47 | 0.00 | 0.01 |
| Solyc11g010630.3 | -1.11 | 0.46 | 0.00 | 0.01 |
| Solyc08g067340.3 | -1.13 | 0.46 | 0.00 | 0.00 |
| Solyc04g005260.2 | -1.14 | 0.45 | 0.00 | 0.04 |
| Solyc08g006850.3 | -1.16 | 0.45 | 0.00 | 0.00 |
| Solyc06g065850.2 | -1.20 | 0.44 | 0.00 | 0.00 |
| Solyc03g119590.1 | -1.29 | 0.41 | 0.00 | 0.00 |
| Solyc01g090890.3 | -1.38 | 0.38 | 0.00 | 0.00 |
| Solyc03g005530.1 | -1.41 | 0.38 | 0.00 | 0.00 |
| Solyc03g095770.3 | -1.41 | 0.38 | 0.00 | 0.00 |
| Solyc10g085850.1 | -1.47 | 0.36 | 0.00 | 0.00 |
| Solyc01g014143.1 | -1.54 | 0.34 | 0.00 | 0.00 |
| Solyc05g008150.3 | -1.63 | 0.32 | 0.00 | 0.00 |
| Solyc02g086460.3 | -1.78 | 0.29 | 0.00 | 0.00 |
| Solyc04g015120.3 | -1.85 | 0.28 | 0.00 | 0.00 |
| Solyc12g006130.2 | -2.16 | 0.22 | 0.00 | 0.00 |
| Solyc09g007020.2 | -2.17 | 0.22 | 0.00 | 0.00 |
| Solyc03g098010.3 | -2.78 | 0.15 | 0.00 | 0.00 |

---
